1 Manner of death and demographic effects on microbial community composition in organs  
2 of the human cadaver

3

4 Holly Lutz<sup>1,2,\*</sup>, Alexandria Vangelatos<sup>3</sup>, Neil Gottel<sup>1,2</sup>, Emily Speed<sup>4</sup>, Antonio Osculati<sup>5</sup>,  
5 Silvia Visona<sup>5</sup>, Sheree J. Finley<sup>6</sup>, Sari Tuomisto<sup>7</sup>, Pekka Karhunen<sup>7</sup>, Jack A. Gilbert<sup>1,2</sup>,  
6 Gulnaz T. Javan<sup>6,\*</sup>

7

8 <sup>1</sup> Department of Pediatrics, University of California San Diego, La Jolla, California,  
9 USA.

10 <sup>2</sup> Scripps Institution for Oceanography, UCSD, La Jolla, California, USA

11 <sup>3</sup> Biological Sciences Division, University of Chicago, Chicago, IL 60637

12 <sup>4</sup> District One Medical Examiner's Office, Pensacola, FL 32504, USA

13 <sup>5</sup> Department of Public Health, Experimental and Forensic Medicine, University of Pavia,  
14 via Forlanini 12, 27100 Pavia, Italy

15 <sup>6</sup> Physical Sciences Department, Forensic Science Program, Alabama State University,  
16 915 S. Jackson St., Montgomery, AL 36104, USA

17 <sup>7</sup> Finnish Cardiovascular Research Center Tampere, Faculty of Medicine and Health  
18 Technology, Tampere University, Tampere Finland; Fimlab Laboratories Ltd, Pirkanmaa  
19 Hospital District, Tampere, Finland

20 \*Corresponding authors

21

22

23

24

25 Abstract

26

27 The microbiome serves important functions in human health, and postmortem, the  
28 microbial signatures of colonized organ tissue could be useful in helping to predict the  
29 manner of death in cases where this information is not known. We surveyed the  
30 microbiota (16S rRNA V4 amplicon sequencing) of 265 organ tissue samples including  
31 liver, blood, brain, heart, prostate, spleen and uterus from cadavers in Italy, Finland and  
32 the United States with confirmed manners of death comprising either accidental death,  
33 natural death, homicide, and suicide. Geographic locality (i.e. nationality) had a strong  
34 effect on observed microbial composition. Differing PERMANOVA results between  
35 unweighted and weighted UniFrac (nearly inverse results) suggest that specific bacteria  
36 may be associated with ethnicity and age, but that these differences are negligible when  
37 taking into account the relative abundance of bacterial taxa; weighted UniFrac measures  
38 suggest that although taxonomic composition may not vary significantly between  
39 different manners of death, PMI, or BMI categories, the relative abundance of specific  
40 taxa vary significantly. Various tissues exhibit differential associations with bacteria, and  
41 prostate and uterus were substantially different compared to other organs. For example, in  
42 Italian cadavers, the bacteria MLE1-12 permeated nearly all tissues, except the prostate  
43 and uterus. We identified specific bacterial ASVs as biomarkers of either natural or  
44 accidental death and suicide, but not for homicide. While the manner of death may have  
45 an impact on microbial associations, further investigation under more controlled

46 conditions will be needed to validate whether these associations are predictive in forensic  
47 determinations.

48

49

50 Key words: Human cadaver; thanatomicrobiome; manner of death

51

52 Importance

53

54 The utilization of microbial data in the context of forensic investigations holds great  
55 promise for the field of forensic science. Identification of taxa that are associated with  
56 postmortem interval (PMI), specific manners of death (MOD), or other traits such as age,  
57 sex, ethnicity, and nationality may allow investigators to refine the circumstantial details  
58 surrounding the death of an individual. In this study we find nationality (geographic  
59 location of cadaver) to be a dominant predictor of cadaver microbiome composition. We  
60 also identify a number of cadaver-specific traits to be associated with microbial alpha-  
61 and beta diversity, as well as bacterial taxa that are differentially associated with these  
62 traits.

63

64 1. Introduction

65

66 During life, the microbiome serves important health-related functions including  
67 nutrient acquisition, pathogen defense, energy salvage, and immune defense training (1).  
68 The microbiome has also been linked to cardiovascular, metabolic and immune disease,

69 as well as mental health disorders via the gut-brain-axis (2). Upon death, microbial  
70 communities present within and on the body are exposed to radical environmental  
71 changes, and recent studies have shown that microbial succession among mammalian  
72 cadavers follows a metabolically predictable progression (3, 4).

73 Forensic microbiology represents a potential emerging discipline in which  
74 microorganisms serve as forensic tools or trace evidence. Advances in DNA sequencing  
75 technologies paired with increased understanding of the human microbiome have hinted  
76 at the possibility that the microbiome could be used as a biomarker of decay (3) and as  
77 trace evidence to link individual people to objects they have previously interacted with  
78 (5-9). Recent studies have also shown that the microbiome can be used to estimate the  
79 amount of time that has elapsed since death, referred to as the postmortem interval (PMI),  
80 allowing investigators to establish a potential timeline of death (3, 10-16).

81 The microbial composition and abundance associated with internal organ tissues  
82 are dependent on temperature, manner/cause of death, and PMI, since bacteria have  
83 different growth optima based on the physicochemical constraints of their environment  
84 (17-19). Also microbial abundance associated with the body antemortem can play a role  
85 in decay, as a cadaver of an aged adult human, with approximately 40 trillion microbial  
86 cells, decays more rapidly than a deceased fetus or newborn, which usually have reduced  
87 microbial colonization density (20). Of course, these trends are contingent upon the  
88 medications and disease state of the individual.

89 Here we investigate the extent to which microbial associations among different  
90 organs in human cadaver can be used to predict manner of death (MOD), PMI, and  
91 geographic locality of origin. By sampling human cadavers from three disparate

92 geographic origins (Finland, Italy, and the United States), we were able to ascertain that  
93 geographic locality has a significant influence on microbial community composition of  
94 postmortem tissues, and that despite these differences, commonalities may still be  
95 identified both among tissues, and individuals who died due to varying causes of death  
96 (e.g. natural, accidental, homicidal, and suicidal deaths). We were unable to detect  
97 significant correlations between various samples and the postmortem interval, likely due  
98 to the fact that the sampling regimen was optimized to capture variation among  
99 geographic locality, organ type, and manner of death. Significant patterns were observed  
100 in this study associated with geography and manner of death warrant reinforcement from  
101 additional investigations to elucidate the origin of these associations.

102

## 103 2. Methods

104

### 105 2.1 Sampling

106

107 Postmortem samples included corpses from the Alabama Department of Forensic  
108 Sciences in Montgomery, AL, USA and The Office of the District One Medical  
109 Examiner in Pensacola, FL, USA; Pavia University in Italy; and Tampere University in  
110 Finland. Demographic data were collected on each of the corpses. Corpses were kept in a  
111 morgue at 4°C until the time of tissue collection. The age, sex, BMI, height, ethnicity,  
112 and PMI were documented for each corpse. Tissue sampling was performed in an  
113 examination area with an ambient temperature of 20°C. Sections of the internal organs  
114 was dissected using a sterile scalpel and placed in labeled, sterile polyethylene bags. For

115 the USA samples, tissues were transported from the morgue to the laboratory on ice and  
116 immediately frozen at -80°C until processing. DNA was extracted from internal organs  
117 by conventional chemical and physical disruption protocols (21) using the phenol  
118 chloroform method, which is specifically optimized for recovery of microbial DNA from  
119 low-yield samples. The quality and quantity of DNA was determined by  
120 spectrophotometry (NanoDrop™).

121

## 122 2.2 DNA extraction and sequencing and statistical analyses

123

124 We used the standard 515F and 806R primers (22-24) to amplify the V4 region of the  
125 16S rRNA gene, using mitochondrial blockers to reduce amplification of host  
126 mitochondrial DNA. Sequencing was performed using paired-end 150 base reads on an  
127 Illumina HiSeq sequencing platform. Following standard demultiplexing and quality  
128 filtering using the Quantitative Insights Into Microbial Ecology pipeline (QIIME2) (25)  
129 and vsearch8.1 (26), Absolute Sequence Variants (ASVs) were identified using the  
130 Deblur method (27) and taxonomy was assigned using the Greengenes Database (May  
131 2013 release; <http://greengenes.lbl.gov>).

132

## 133 2.3 Statistical analyses

134

135 Following quality filtering and taxonomy assignment, sequence libraries were  
136 rarefied to a read depth of 5,000 reads, and rarefied libraries were used for all subsequent  
137 analyses. Alpha diversity was calculated using the Shannon index, and measured species

138 richness based on actual observed diversity. Significance of differing mean values for  
139 each diversity calculation was determined using the Kruskal-Wallis rank sum test,  
140 followed by a post-hoc Dunn test with Benjamini-Hochberg corrected *p*-values. Two  
141 measures of beta diversity (unweighted UniFrac and weighted UniFrac) were calculated  
142 using relative abundances of each ASV (calculated as ASV read depth divided by total  
143 library read depth). Significant drivers of community similarity were identified using the  
144 ADONIS test with Bonferroni correction for multiple comparisons using the R package  
145 Phyloseq (28). ANCOM analyses were performed to assess significance of differential  
146 abundance based on log2fold change measures between categories (e.g. geographic  
147 localities, organ types, and manners of death). Analyses were run independently for each  
148 variable, e.g. ASVs associated with Finnish cadavers were compared to ASVs from all  
149 other localities grouped together, ASVs associated with Italian cadavers were compared  
150 to those from all other localities, and so on. Additional R packages used for analyses and  
151 figure generation included vegan (29), ggplot2 (30), and dplyr (31). For a complete list of  
152 packages and codes for microbiome analyses, see  
153 <http://github.com/hollylutz/CadaverMP>. All 16S rRNA sequence and sample metadata  
154 are publicly available via the QIITA platform under Study ID ##### and the European  
155 Bioinformatics Institute (EBI) under accession number #####.

156

### 157 3. Results

158

#### 159 3.1 Cadaver and organ sampling and analysis

160

161 We collected 265 samples of multiple organs from corpses derived from Finland,  
162 Italy, and the United States (Table S1). Sampling spanned PMIs of 3.5 to 432 hours (avg  
163 = 87.6 hours) and included tissues from cadavers corresponding to different manners of  
164 death grouped into four categories: accidental death (n = 88), natural death (n = 106),  
165 homicide (n = 23), and suicide (n = 45) (Table 2). In total, 4,337,301 16S rRNA V4  
166 amplicon sequencing reads were generated from 265 samples, comprising 2,204 ASVs.  
167 Following sequence deblurring and rarefaction analysis (5,000 read per library cut-off),  
168 we identified 1,855 ASVs across 163 remaining samples (Table 1), with a range of 239 to  
169 1,413 ASVs across different organs.

170

**Table 1.** Sampling by geographic location and organ, post-rarefaction

| Location     | Organ    |           |           |           |           |           |          |
|--------------|----------|-----------|-----------|-----------|-----------|-----------|----------|
|              | Blood    | Brain     | Heart     | Liver     | Prostate  | Spleen    | Uterus   |
| Finland      | 0        | 0         | 0         | 20        | 0         | 0         | 0        |
| Italy        | 0        | 10        | 9         | 13        | 13        | 10        | 5        |
| USA          | 6        | 9         | 11        | 47        | 0         | 10        | 0        |
| <b>Total</b> | <b>6</b> | <b>19</b> | <b>20</b> | <b>80</b> | <b>13</b> | <b>20</b> | <b>5</b> |

171

172

**Table 2.** Sampling by manner of death and geographic locality, post-rarefaction, with PMI statistics; undetermined MOD (n=2) excluded from analyses.

| Location     | Manner of Death |             |              |             | Postmortem Interval      |                          |                          |                         |
|--------------|-----------------|-------------|--------------|-------------|--------------------------|--------------------------|--------------------------|-------------------------|
|              | Accident (n)    | Natural (n) | Homicide (n) | Suicide (n) | PMI <sub>min</sub> (hrs) | PMI <sub>max</sub> (hrs) | PMI <sub>avg</sub> (hrs) | PMI <sub>SD</sub> (hrs) |
| Finland      | 6               | 12          | 0            | 2           | 48                       | 192                      | 108                      | 42.3                    |
| Italy        | 20              | 24          | 3            | 13          | 24                       | 432                      | 112                      | 96.4                    |
| USA          | 31              | 29          | 9            | 12          | 3.5                      | 240                      | 37.8                     | 47.8                    |
| <b>Total</b> | <b>57</b>       | <b>65</b>   | <b>12</b>    | <b>27</b>   |                          |                          |                          |                         |

173

174

175 3.2 Alpha diversity



176

177           Alpha diversity, calculated as observed number (richness) of ASVs and the  
178 Shannon diversity index, differed significantly between some but not all organs and  
179 varied by locality (both,  $p < 0.05$ , Kruskal-Wallis). Post-hoc tests (corrected for multiple  
180 comparisons using the Benjamini-Hochberg method) revealed that among Italian  
181 subjects, the prostate and uterus differed significantly from all other organs (brain, heart,  
182 liver, and spleen) in both observed richness ( $p < 0.05$ , Dunn's Test) and Shannon  
183 diversity ( $p < 0.05$ , Dunn's Test), but they did not differ significantly from each other  
184 (Fig. 1A and 1B). Among subjects from the United States (USA), the only organs that  
185 differed significantly by Shannon diversity were heart and liver ( $p = 0.032$ , Dunn's Test),  
186 and no organs differed significantly by observed richness (Fig.1A). A comparison of  
187 alpha diversity measures for liver samples from all three localities (Finland, Italy, USA)  
188 identified significant differences in both observed richness and Shannon diversity  
189 between liver tissue from Finland and the USA ( $p < 0.05$ , Dunn's Test), and Finland and  
190 Italy ( $p < 0.05$ , Dunn's Test), but not between Italian and US livers (Fig. 1C).

191           Alpha diversity differed significantly by manner of death among USA organs ( $p <$   
192  $0.05$ , Kruskal-Wallis), but not among Italian or Finnish organs. Among USA organs,  
193 observed richness differed significantly between accidental deaths and homicides ( $p <$   
194  $0.0177$ , Dunn's Test), accidental deaths and suicides ( $p < 0.0002$ , Dunn's Test), and  
195 natural deaths and suicides ( $p < 0.0005$ , Dunn's Test), but not between homicides and  
196 suicides, natural deaths and accidents, or natural deaths and homicides (Fig. 2A). Also  
197 among USA organs, Shannon diversity differed significantly between accidental deaths  
198 and suicides ( $p < 0.0001$ , Dunn's Test), natural deaths and homicides ( $p < 0.008$ , Dunn's

199 Test), and natural deaths and suicides ( $p = 0.000$ , Dunn's Test), but not between  
200 homicides and suicides, natural deaths and accidents, or accidental deaths and homicides  
201 (Fig. 2B).

202 Using linear regression of alpha diversity against PMI, the only significant  
203 associations observed were among Italian spleens (observed richness:  $p = 0.016$ ,  $R^2 =$   
204  $0.48$ ; Figure S1) and Finnish livers (Shannon Index:  $p = 0.021$ ,  $R^2 = 0.22$ ; Figure S2).  
205 Similarly, we found little evidence for a correlation between BMI and bacterial alpha  
206 diversity among organs, with the exception of the Italian prostate (observed richness:  $p =$   
207  $0.019$ ,  $R^2 = 0.35$ ; Figure S3; Shannon Index:  $p = 3.58 \times 10^{-5}$ ,  $R^2 = 0.62$ ; Figure S4) and the  
208 US spleen (Shannon Index:  $p = 0.017$ ,  $R^2 = 0.47$ ; Figure S4).

209

### 210 3.3 Beta diversity

211

212 Analysis of beta diversity, using unweighted UniFrac, found a strong effect of  
213 geographic locality on postmortem bacterial community composition (Fig. 3A), whereby  
214 the microbial composition and compositional proportion were significantly different  
215 between each country (PERMANOVA: unweighted UniFrac,  $p = 0.001$ ,  $R^2 = 0.18$ ;  
216 weighted UniFrac,  $p = 0.001$ ,  $R^2 = 0.12$ ). No clear differences in beta diversity were  
217 visible by organ type (Fig. 3B) or organ type within each country, except for the uterus  
218 and prostate differing from all other organs in Italy (Fig. 3C), although, organ was  
219 technically a significant predictor of beta diversity (PERMANOVA: unweighted  
220 UniFrac,  $p = 0.001$ ,  $R^2 = 0.08$ ; weighted UniFrac,  $p = 0.001$ ,  $R^2 = 0.06$ ). Controlling for  
221 locality as a confounding variable, PERMANOVA analyses of weighted and unweighted

222 UniFrac diversity metrics identified a number of variables significantly associated with  
 223 microbial beta diversity, though these variables differed between the two metrics (Table  
 224 3). For unweighted UniFrac, significant variables included ethnicity and age ( $p < 0.05$ ,  
 225 PERMANOVA). For weighted UniFrac, significant variables included manner of death,  
 226 PMI, and BMI ( $p < 0.05$ , PERMANOVA).

Table 3. PERMANOVA analysis assessing marginal effects of variables on weighted and unweighted UniFrac beta diversity, controlling for geographic locality (ADONIS, strata = locality); asterisk indicates Bonferroni adjust  $p$ -value  $< 0.05$ .

|                    | Df | SumOfSqs | R <sup>2</sup> | F    | $p$ -value |
|--------------------|----|----------|----------------|------|------------|
| Unweighted UniFrac |    |          |                |      |            |
| Sex                | 1  | 0.41     | 0.01           | 1.7  | 0.36       |
| Ethnicity          | 3  | 4.03     | 0.09           | 5.46 | 0.006*     |
| Age                | -  | 0.77     | 0.02           | 2.95 | 0.012*     |
| Manner of death    | 3  | 1.2      | 0.03           | 1.57 | 0.096      |
| PMI                | -  | 0.37     | 0.01           | 1.49 | 0.56       |
| BMI                | -  | 0.41     | 0.01           | 1.65 | 0.26       |
| Weighted UniFrac   |    |          |                |      |            |
| Organ              | 6  |          |                |      |            |
| Sex                | 1  | 0.07     | 0.01           | 2.32 | 0.35       |
| Ethnicity          | 3  | 0.37     | 0.06           | 3.85 | 0.73       |
| Age                | -  | 0.1      | 0.02           | 3.23 | 0.14       |
| Manner of death    | 3  | 0.23     | 0.04           | 2.33 | 0.006*     |
| PMI                | -  | 0.11     | 0.02           | 3.41 | 0.018*     |
| BMI                | -  | 0.14     | 0.02           | 4.21 | 0.006*     |

227

228

229 3.4 Specific bacterial taxa associated with different factors

230

231 Analysis of composition of microbiomes (ANCOM) between different localities,  
 232 organs, and manners of death identified significant differences in relative abundance  
 233 (measured as the log<sub>2</sub>fold change in 16S rRNA ASV read counts) of multiple bacterial

234 taxa. Assessing differences between localities (controlling for age, sex, BMI, PMI,  
235 ethnicity, and organ), we found that Finnish cadavers exhibited enrichment of two ASVs  
236 in the class Bacilli, as well ASVs belonging to the Alphaproteobacteria and  
237 Gammaproteobacteria, relative to cadavers from Italy and the United States ( $p < 0.05$ ,  
238 ANCOM). Among Italian cadavers, we observed enrichment for ASVs in the classes  
239 Saprospirae, 4C0d-2 (phylum Cyanobacteria), Betaproteobacteria, Gammaproteobacteria,  
240 and Gemmatimonadetes ( $p < 0.05$ , ANCOM). And among US cadavers, we observed a  
241 significant enrichment in ASVs annotated to the class Clostridia, as well as enrichment of  
242 several ASVs belonging to the classes Alphaproteobacteria, Bacilli and Bacteroidia ( $p <$   
243  $0.05$ , ANCOM) (Fig. 4; Table S2).

244 Analysis of differences in bacterial relative abundance between organs  
245 (controlling for age, sex, BMI, PMI, ethnicity, and locality) found increased proportion of  
246 a single Clostridia ASV (family Peptostreptococcaceae) in the blood, and a single  
247 Gammaproteobacteria in the heart (family Pseudomonadaceae, *Pseudomonas* sp.).  
248 Among brain tissue, a number of bacterial taxa were found to be underrepresented  
249 relative to all other organs, and none were found to be significantly enriched. Both liver  
250 and spleen exhibited an increased relative abundance of a bacterial ASVs in the class  
251 4C0d-2 (order MLE1-12, unknown family), as well as *Sphingomonas yabuuchiae* (family  
252 Sphingomonadaceae). Other bacterial ASVs enriched in both the liver and spleen  
253 included those from classes Betaproteobacteria (specifically a single ASV in the family  
254 Rhodocyclaceae), Clostridia (specifically a single ASV in the family  
255 Peptostreptococcaceae), and Saprospirae (specifically two ASVs in the family  
256 Chitinophagaceae, and one ASV in the genus *Sediminibacterium*). The liver and prostate

257 were both enriched for two ASVs in the class Bacteroidia, one in the family  
258 Comamonadaceae (genus *Limnohabitans*) and another in the family Oxalobacteraceae  
259 (unknown genus). The liver alone was enriched for several bacterial taxa not seen in  
260 other organs, including a Clostridia ASV in the family Lachnospiraceae (genus *Blautia*),  
261 an Alphaproteobacteria ASV in the order Rhizobiales (unknown family), and a  
262 Gammaproteobacteria in the family Enterobacteriaceae (genus *Salmonella*). Uterine  
263 tissues were enriched for only two ASVs, which were not found to be enriched in any  
264 other organs, including a single ASV in the class Bacilli (family Lactobacillaceae, genus  
265 *Lactobacillus*) and a single ASV in the class Gammaproteobacteria (family  
266 Enterobacteriaceae, unknown genus). Lastly, among prostate tissues we found a  
267 significant underrepresentation of the same 4C0d-2 ASV (order MLE1-12) observed in  
268 both liver and spleen, and a single Clostridia ASV (family Lachnospiraceae, unknown  
269 genus) relative to all other organs (except for brain, which was also depauperate with  
270 respect to the 4C0d-2 ASV) (Fig. 5; Table S3).

271 A number of unique associations between ASVs and manner of death (controlling  
272 for age, sex, BMI, PMI, ethnicity, locality, and organ) were observed. For natural deaths,  
273 this included an enrichment of the same ASV in class 4C0d-2 (order MLE1-12)  
274 mentioned previously, as well as enrichment for single ASVs in the classes Bacilli  
275 (family Lactobacillaceae, *Lactobacillus zeae*), Gammaproteobacteria (family  
276 Enterobacteriaceae, unknown genus), and Saprospirae (family Chitinophagaceae, genus  
277 *Sediminibacterium*). Among victims of accidental death, a single Bacilli ASV (order  
278 Lactobacillales, unknown family) and Gammaproteobacteria (family Enterobacteriaceae,  
279 unknown genus) were enriched. Homicide victims did not exhibit enrichment of any

280 bacterial taxa, but exhibited a decreased abundance of ten different ASVs belonging to  
281 the class Bacilli, as well as ASVs in the classes Bacteroidia (family Prevotellaceae,  
282 *Prevotella melaninogenica*), Clostridia (family Veillonellaceae, *Veillonella dispar*), and  
283 Gammaproteobacteria (family Enterobacteriaceae, genus *Salmonella*) relative to other  
284 samples. Lastly, victims of suicide showed a similar decrease in the same  
285 Gammaproteobacteria ASV (family Enterobacteriaceae, *Salmonella*) as homicide  
286 victims, as well as decreases in another gammaproteobacterium ASV (family  
287 Pseudomonadaceae, genus *Pseudomonas*), and two ASVs in the class Clostridia (family  
288 Peptostreptococcaceae, unknown genus, and family Ruminococcaceae, *Faecalibacterium*  
289 *prausnitzii*). Other Clostridia ASVs were enriched in suicide victims, including two  
290 ASVs in the family Lachnospiraceae (genus *Blautia*), and one in the family  
291 Clostridiaceae (genus *Clostridium*). The only ASV belonging to class  
292 Alphaproteobacteria (order Rhizobiales) with significantly different relative abundance  
293 among manner of death categories was found to be enriched in suicide victims as well  
294 (Fig. 6; Table S4).

295

#### 296 4. Discussion

297 In this investigation we have compared existing data and newly collected samples from  
298 different organs associated with cadavers from Italy, Finland and the United States of  
299 America. We demonstrate that both the microbial alpha and beta diversity shows  
300 differential associations between organ tissue type, country or origin, and manner of  
301 death; but PMI and BMI show very few significant associations. However, the lack of  
302 consistency of the association of microbial diversity with these cadaver metrics suggests

303 that neither alpha or beta diversity metrics would be reliable predictors of country of  
304 origin or manner of death. However, we did identify specific bacterial taxa that were  
305 enriched in differential organs, and that were significant associated with both country of  
306 origin and manner of death. This suggests potential biomarkers of manner of death could  
307 be possibly validated through further and independent experimentation, observation and  
308 validation.

309 A previous microbial survey of internal organ tissues (e.g., brain, heart, liver, and  
310 spleen) of four cadavers, associated with a homicide, suicide, over-dose, and accidental  
311 death cases, demonstrated that the obligate anaerobe, *Clostridium* was found in cadavers  
312 of varying PMIs, while the facultative anaerobe, *Lactobacillus*, was more abundant in  
313 cadavers with shorter PMIs (12). Other investigations performed exploratory analyses of  
314 bacteria present in mouth and rectal scrapings taken at the onset and end of the bloat  
315 stage of corpses decomposing in a natural setting (32). However, internal organs were not  
316 sampled across time points in this study. Another postmortem microbiome study of 33  
317 bodies was conducted using bacterial culturing and reverse transcriptase quantitative PCR  
318 (RT-qPCR) techniques to profile the microbes in blood, liver, portal vein, mesenteric  
319 lymph node, and pericardial fluid, and identified 21 genera, with the most abundant being  
320 *Staphylococcus* sp., *Streptococcus* sp., *Clostridium* sp., *Enterococcus* sp., and  
321 *Escherichia* sp. (33)

322 We identified many different taxa as being associated with manner of death,  
323 including *Lactobacillus*, Enterobacteriaceae, *Sediminibacterium*, *Blautia*, Rhizobiales,  
324 and *Clostridium*. In several recent postmortem microbiome studies, the clostridia were  
325 observed to proliferate postmortem (11, 12), potentially in part due to an increase in

326 available nutrients and energy obtained from fermentation reactions (34). Most  
327 *Clostridium* spp. grow strictly in the absence of oxygen and a doubling time of 7.4  
328 minutes (35) which may explain why they so easily colonize the still anaerobic body  
329 cavity postmortem. The presence of species of *Lactobacillus*, Enterobacteriaceae, and  
330 *Blautia* may be similarly explained. However, the enrichment of *Sediminibacterium* and  
331 Rhizobiales in natural deaths and suicides respectively, which are traditionally associated  
332 with soil, is harder to understand but may represent colonization by environmental  
333 bacteria.

334 In conclusion, we have identified a number of taxa that may be predictive of  
335 manner of death, but this result needs substantial independent validation, and further  
336 controlled studies to determine whether the associations are based on biological  
337 phenomena.

338

### 339 **Funding**

340 Funding was provided by University of Chicago and the National Institute of Justice  
341 (2017-MU-MU-0042). Opinions or points of view expressed represent a consensus of the  
342 authors and do not necessarily represent the official position or policies of the United  
343 States Department of Justice.

344

### 345 **References**

346

- 347 1. **Gilbert JA, Quinn RA, Debelius J, Xu ZZ, Morton J, Garg N, Jansson JK,**  
348 **Dorrestein PC, Knight R.** 2016. Microbiome-wide association studies link  
349 dynamic microbial consortia to disease. *Nature* **535**:94-103.
- 350 2. **Gilbert JA, Blaser MJ, Caporaso JG, Jansson JK, Lynch SV, Knight R.**  
351 2018. Current understanding of the human microbiome. *Nat Med* **24**:392-400.
- 352 3. **Metcalf CJE, Xu ZZ, Weiss S, Lax S, Van Treuren W, Hyde ER, Song SJ,**  
353 **Amir A, Larsen P, Sangwan N, Haarmann D, Humphrey GC, Ackermann G,**  
354 **Thompson LR, Lauber CL, Bibat A, Nicholas C, Gebert MJ, Petrosino JF,**



- 355 **Reed SC, Gilbert JA, Lynne AM, Bucheli SR, Carter DO, Knight R.** 2016.  
356 Microbial community assembly and metabolic function during mammalian  
357 corpse decomposition. *Science* **351**:158-162.
- 358 4. **Javan GT FS, Tuomisto S, Hall A, Benbow ME, Mills D.** . 2019. An  
359 interdisciplinary review of the thanatomicrobiome in human decomposition.  
360 *Forensic Science, Medicine, and Pathology* **15**:75-83.
- 361 5. **Lax S, Hampton-Marcell JT, Gibbons SM, Colares GB, Smith D, Eisen JA,**  
362 **Gilbert JA.** 2015. Forensic analysis of the microbiome of phones and shoes.  
363 *Microbiome* **3**:21.
- 364 6. **Fierer N, Lauber CL, Zhou N, McDonald D, Costello EK, Knight R.** 2010.  
365 Forensic identification using skin bacterial communities. *Proc Natl Acad Sci U S*  
366 *A* **107**:6477-6481.
- 367 7. **Park J, Kim SJ, Lee J-A, Kim JW, Kim SB.** 2017. Microbial forensic analysis  
368 of human-associated bacteria inhabiting hand surface. *Forensic Science*  
369 *International: Genetics Supplement Series* **6**:e510-e512.
- 370 8. **Schmedes SE, Woerner AE, Budowle B.** 2017. Forensic human identification  
371 using skin microbiomes. *Appl Environ Microbiol* **83**.
- 372 9. **Kodama WA, Xu Z, Metcalf JL, Song SJ, Harrison N, Knight R, Carter DO,**  
373 **Happy CB.** 2018. Trace Evidence Potential in Postmortem Skin Microbiomes:  
374 From Death Scene to Morgue. *J Forensic Sci* doi:10.1111/1556-4029.13949.
- 375 10. **Burcham ZM HJ, Pechal JL, Krausz KL, Bose JL, Schmidt CJ, Benbow ME,**  
376 **Jordan HR.** 2016. Fluorescently labeled bacteria provide insight on postmortem  
377 microbial transmigration. *Forensic Science International* **264**:63-69.
- 378 11. **Javan GT FS, Smith T, Miller J, Wilkinson JE.** 2017. Cadaver  
379 thanatomicrobiome signatures: the ubiquitous nature of *Clostridium* species in  
380 human decomposition. *Front Microbiol* **8**.
- 381 12. **Javan GT FS, Can I, Wilkinson JE, Hanson JD, Tarone AM.** 2016. Human  
382 thanatomicrobiome succession and time since death. *Sci Rep* **6**:195-298.
- 383 13. **Cobaugh KL SS, DeBruyn JM.** . 2015. Functional and structural succession of  
384 soil microbial communities below decomposing human cadavers. *PLoS ONE* **10**.
- 385 14. **Hauther KA CK, Jantz LM, Sparer TE, DeBruyn JM.** 2015. Estimating time  
386 since death from postmortem human gut microbial communities. *J Forensic Sci*  
387 **60**:1234-1240.
- 388 15. **Pechal JL CT, Benbow ME, Tarone AM, Dowd S, Tomberlin JK.** . 2014. The  
389 potential use of bacterial community succession in forensics as described by high  
390 throughput metagenomic sequencing. *Int J Legal Med* **128**:193-205.
- 391 16. **Maujean G GT, Fanton L, Malicier D.** 2013. The interest of postmortem  
392 bacteriology in putrefied bodies. *J Forensic Sci* **58**:1069-1070.
- 393 17. **Ercolini D, Russo F, Nasi A, Ferranti P, Villani F.** 2009. Mesophilic and  
394 psychrotrophic bacteria from meat and their spoilage potential in vitro and in  
395 beef. *Appl Environ Microbiol* **75**:1990-2001.
- 396 18. **Deutscher J.** 2008. The mechanisms of carbon catabolite repression in bacteria.  
397 *Curr Opin Microbiol* **11**:87-93.
- 398 19. **Rakoff-Nahoum S, Foster KR, Comstock LE.** 2016. The evolution of  
399 cooperation within the gut microbiota. *Nature* **533**:255-259.

- 400 20. **Campobasso C, Di Vella G, Introna F.** 2001. Factors affecting decomposition  
401 and Diptera colonization. *Forensic Science International* **120**:18-27.
- 402 21. **Amendt J. KR, Zehner R, Bratzke, H. .** 2003. Practice of forensic entomology--  
403 usability of insect fragments in the estimation of the time of death. *Archiv für*  
404 *Kriminologie* **214**:11-18.
- 405 22. **Caporaso JG, Lauber, C. L., Walters, W. A., Berg-Lyons, D., Lozupone, C.**  
406 **A., Turnbaugh, P. J., Fierer, N., Knight, R.** 2011. Global patterns of 16S rRNA  
407 diversity at a depth of millions of sequences per sample. *PNAS* **108**:4516-4522.
- 408 23. **Caporaso JG, Lauber CL, Walters WA, Berg-Lyons D, Huntley J, Fierer N,**  
409 **Owens SM, Betley J, Fraser L, Bauer M, Gormley N, Gilbert JA, Smith G,**  
410 **Knight R.** 2012. Ultra-high-throughput microbial community analysis on the  
411 Illumina HiSeq and MiSeq platforms. *ISME J* **6**:1621-1624.
- 412 24. **Kozich JJ, Westcott, S. L., Baxter, N. T., Highlander, S. K., Schloss, P. D.**  
413 2013. Development of a dual-index sequencing strategy and curation pipeline for  
414 analyzing amplicon sequence data on the MiSeq Illumina sequencing platform.  
415 *Applied and Environmental Microbiology* **79**:5122-5120.
- 416 25. **Caporaso JG, Kuczynski, J., Stombaugh, J., Bittinger, K., Bushman, F. D.,**  
417 **Costello, E. K., Fierer, N., Gonzalez Peña, A., Goodrich, E. K., Gordon, J. L.,**  
418 **Huttley, G. A., Kelley, S. T., Knights, D., Koenig, J. E., Ley, R. E., Lozupone,**  
419 **C. A., McDonald, D., Muegge, B. D., Pirrung, M., Reeder, J., Sevinsky, J. R.,**  
420 **Turnbaugh, P. J., Walters, W. A., Widmann, J., Yatsunencko, T., Zaneveld,**  
421 **J., Knight, R.** 2010. QIIME allows analysis of high-throughput community  
422 sequencing data. *Nature Methods* **7**:335 - 336.
- 423 26. **Rognes T, Flouri T, Nichols B, Quince C, Mahe F.** 2016. VSEARCH: a  
424 versatile open source tool for metagenomics. *PeerJ* **4**:e2584.
- 425 27. **Amir A, McDonald D, Navas-Molina JA, Kopylova E, Morton JT, Zech Xu**  
426 **Z, Kightley EP, Thompson LR, Hyde ER, Gonzalez A, Knight R.** 2017.  
427 Deblur Rapidly Resolves Single-Nucleotide Community Sequence Patterns.  
428 *mSystems* **2**.
- 429 28. **McMurdie PJ, Holmes S.** 2013. phyloseq: an R package for reproducible  
430 interactive analysis and graphics of microbiome census data. *PLoS One* **8**:e61217.
- 431 29. **Oksanen J., Blanchet F. G., Friendly M., Kindt R., Legendre P., McGlenn D.,**  
432 **Minchin P. R., O'Hara R. B., Simpson G. L., Solymos P., Henry M., Stevens**  
433 **H., Szoecs E., H. W.** 2018. *vegan: Community Ecology Package*, vR package  
434 version 2.5-2. <https://CRAN.R-project.org/package=vegan>.
- 435 30. **Wickham H.** 2016. *ggplot2: Elegant Graphics for Data Analysis*. Springer-  
436 Verlag, New York, NY.
- 437 31. **Wickham H, François R, Henry L, Müller K.** 2018. dplyr: A Grammar of Data  
438 Manipulation, vR package version 0.7.6. [https://CRAN.R-](https://CRAN.R-project.org/package=dplyr)  
439 [project.org/package=dplyr](https://CRAN.R-project.org/package=dplyr).
- 440 32. **Hyde ER, Haarmann DP, Lynne AM, Bucheli SR, Petrosino JF.** 2013. The  
441 living dead: bacterial community structure of a cadaver at the onset and end of the  
442 bloat stage of decomposition. *PLoS One* **8**:e77733.
- 443 33. **Tuomisto S, Karhunen PJ, Vuento R, Aittoniemi J, Pessi T.** 2013. Evaluation  
444 of postmortem bacterial migration using culturing and real-time quantitative PCR.  
445 *J Forensic Sci* **58**:910-916.

- 446 34. **DeBruyn JM, Hauther KA.** 2017. Postmortem succession of gut microbial  
447 communities in deceased human subjects. *PeerJ* **5**:e3437.  
448 35. **Willardsen RR, Busta, F. F., and Allen, C. E.** 1979. Growth of *Clostridium*  
449 *perfringens* in three different beef media and fluid thioglycollate medium at static  
450 and constantly rising temperatures. *J Food Prot* **42**:144-148.  
451

452

453 Figure Legends

454

455 Figure 1. Variation in alpha diversity by organ type, A) comparing observed ASV  
456 richness between organs from different localities, B) comparing Shannon diversity index  
457 between organs from different localities. Asterisks indicate significant difference between  
458 groups based on post-hoc Dunn's Tests,  $p < 0.05$ .

459

460 Figure 2. Variation in alpha diversity by manner of death, A) comparing observed ASV  
461 richness between manners of death from different localities, B) comparing Shannon  
462 diversity index between manners of death from different localities. Asterisks indicate  
463 significant difference between groups based on post-hoc Dunn's Tests,  $p < 0.05$ .

464

465 Figure 3. PCoA plots of unweighted UniFrac beta diversity, A) labeled by geographic  
466 locality, B) labeled by organ, and C) labeled by organ and faceted by geographic locality  
467 (Finland not included, as only liver was sampled).

468

469 Figure 4. ANCOM – log2fold change in relative abundance between different cadaver  
470 localities, controlling for age, sex, ethnicity, BMI, PMI, and organ as covariates. ASVs  
471 are colored by bacterial class.

472

473 Figure 5. ANCOM – log2fold change in relative abundance between different organs,  
474 controlling for age, sex, ethnicity, BMI, PMI, and locality as covariates. ASVs are  
475 colored by bacterial class.

476

477 Figure 6. ANCOM – log<sub>2</sub>fold change in relative abundance between different manners of  
478 death, controlling for age, sex, ethnicity, BMI, PMI, organ, and locality as covariates.  
479 ASVs are colored by bacterial class.

480

481 Supplemental Material

482

483 Figure S1. Linear regression of observed ASV richness by postmortem interval (PMI),  
484 faceted by country and organ type.

485

486 Figure S2. Linear regression of Shannon Index by postmortem interval (PMI), faceted by  
487 country and organ type.

488

489 Figure S3. Linear regression of observed ASV richness by body mass index (BMI),  
490 faceted by country and organ type.

491

492 Figure S4. Linear regression of Shannon Index by postmortem interval (BMI), faceted by  
493 country and organ type.

494

495 Table S1. Cadaver sampling metadata.

496

497 Table S2. Complete ANCOM results for analysis of log<sub>2</sub>fold change in relative  
498 abundance by country.

499

500 Table S3. Complete ANCOM results for analysis of log<sub>2</sub>fold change in relative  
501 abundance by organ type, controlling for age, sex, BMI, PMI, ethnicity, and locality.

502

503 Table S4. Complete ANCOM results for analysis of log<sub>2</sub>fold change in relative  
504 abundance by manner of death (MOD), controlling for age, sex, BMI, PMI, ethnicity, and

505 locality.

Figure 1

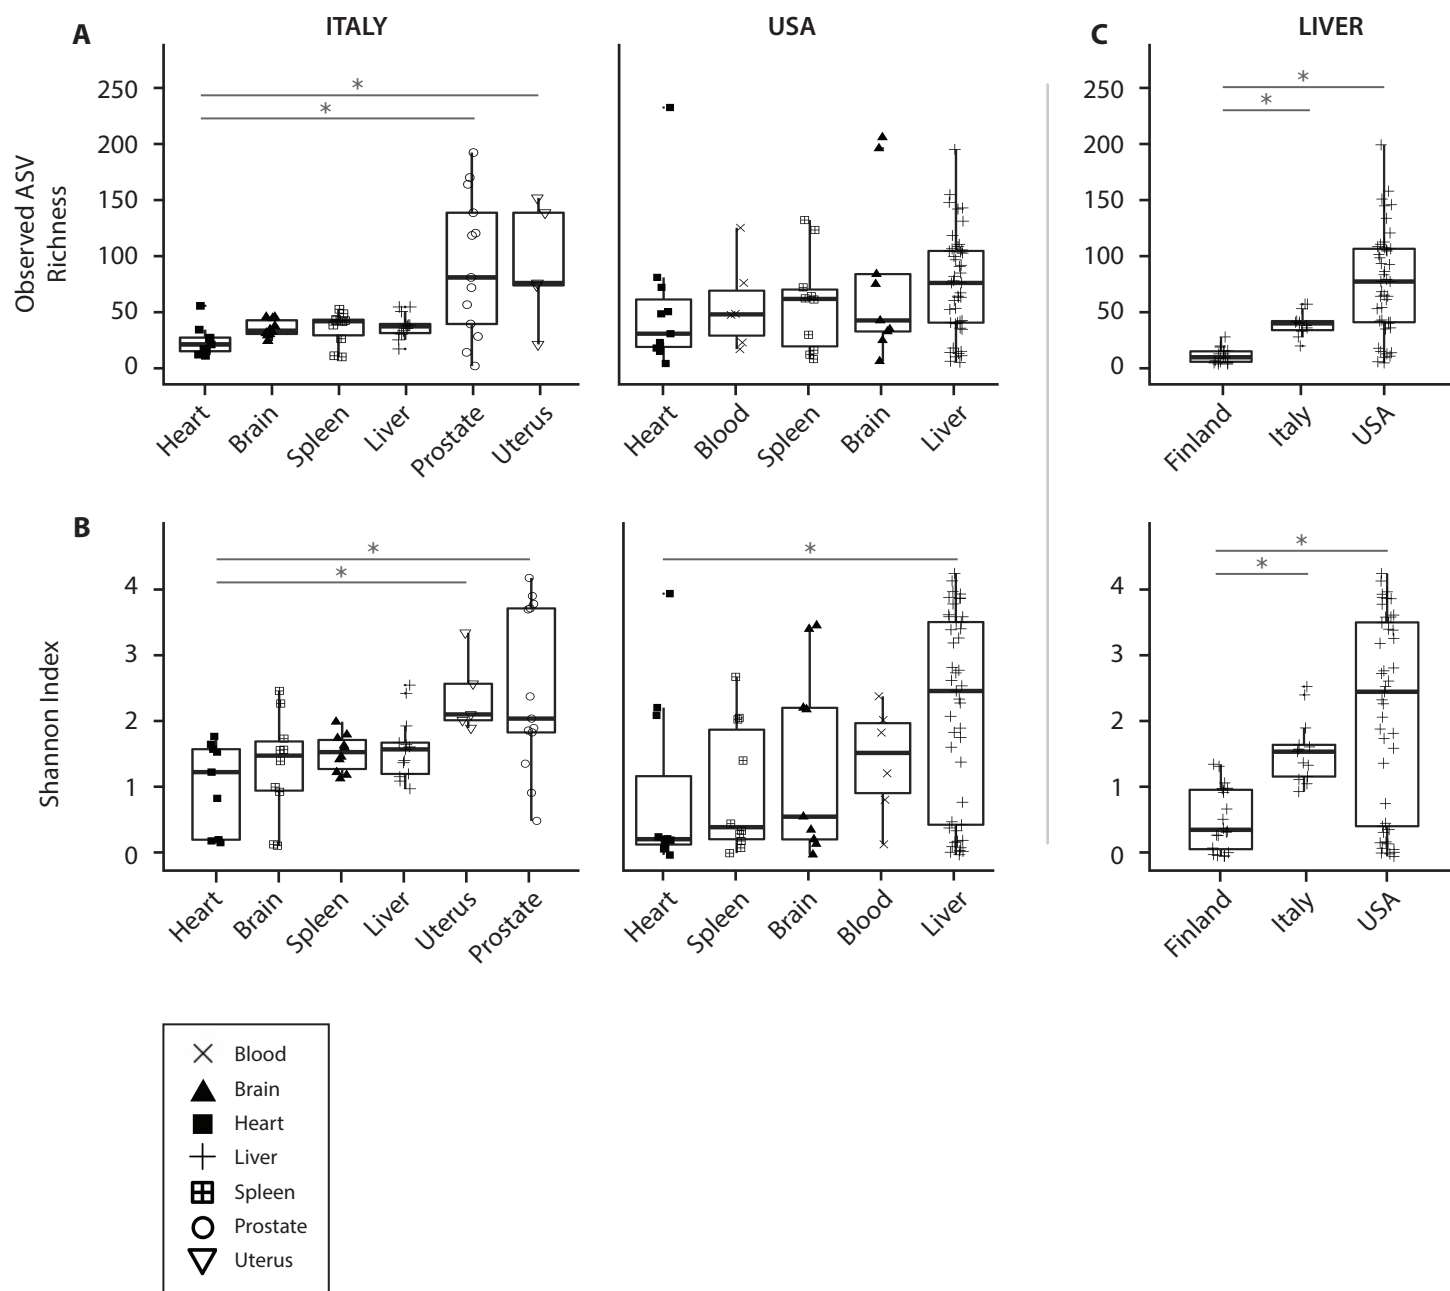

Figure 2

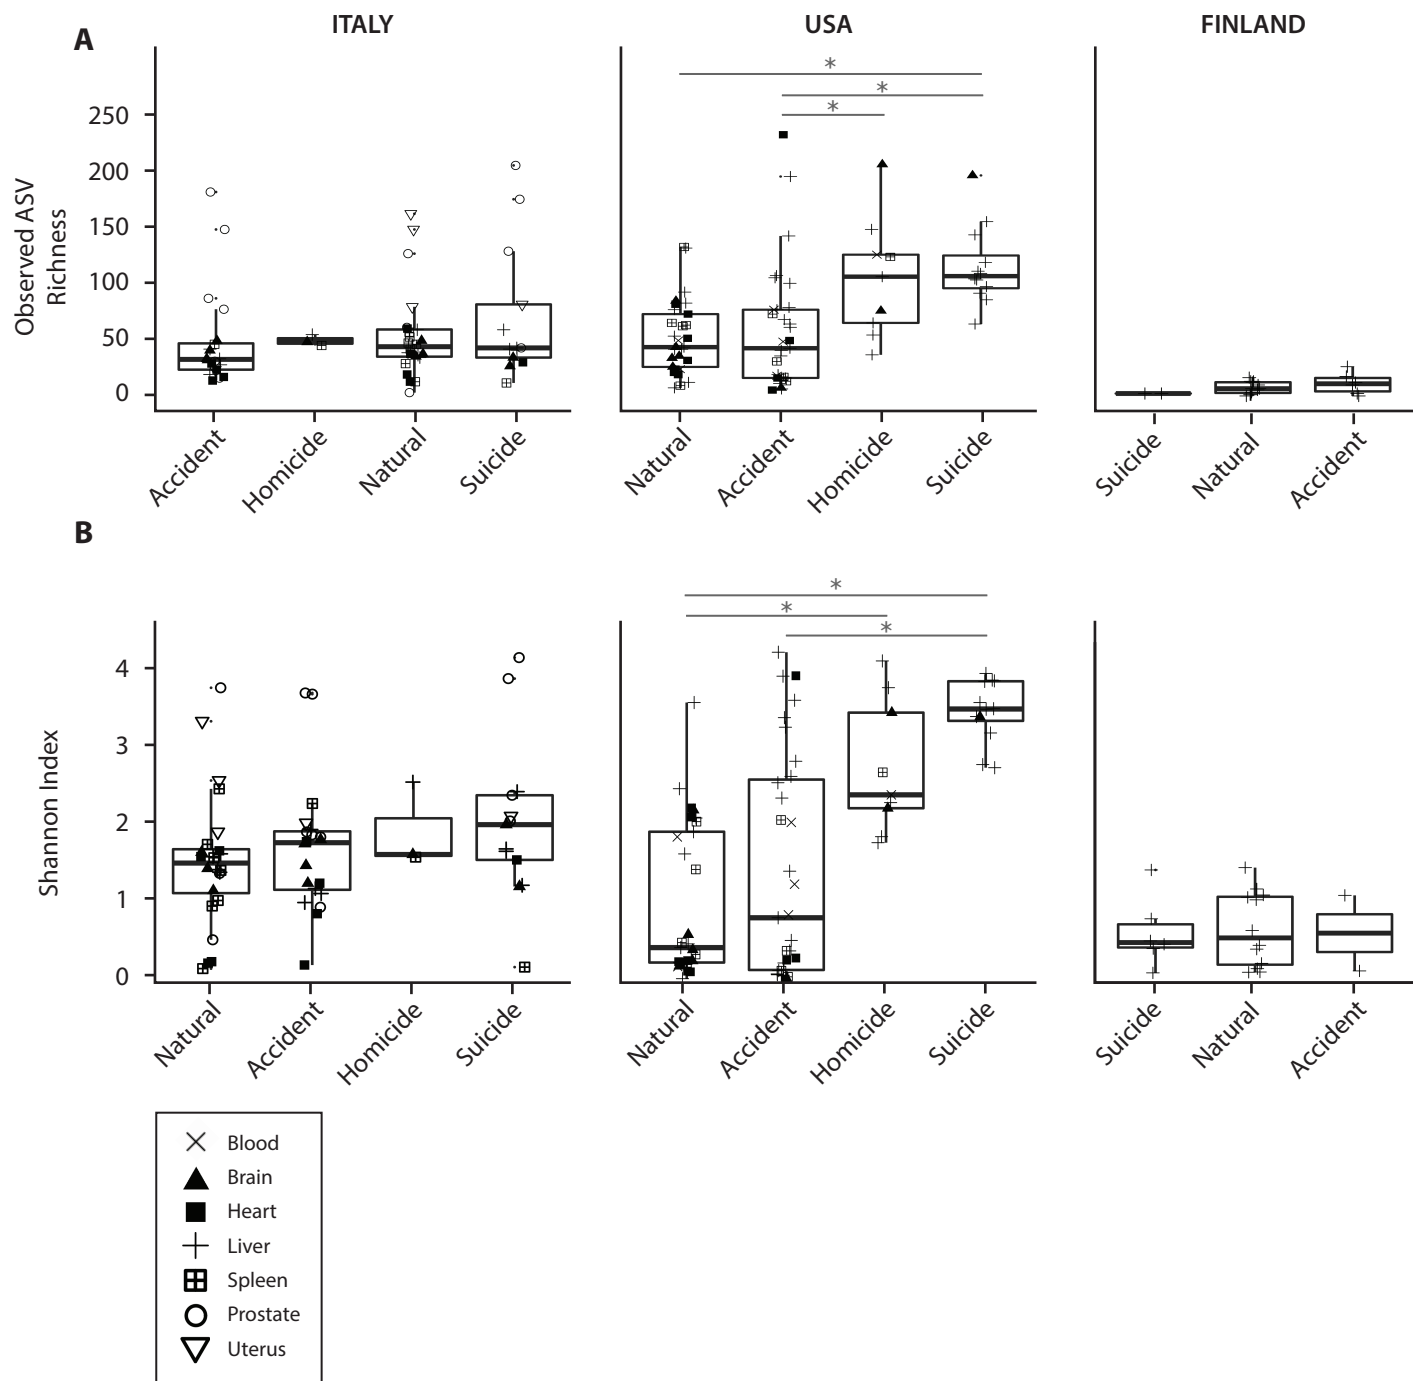

**Figure 3**

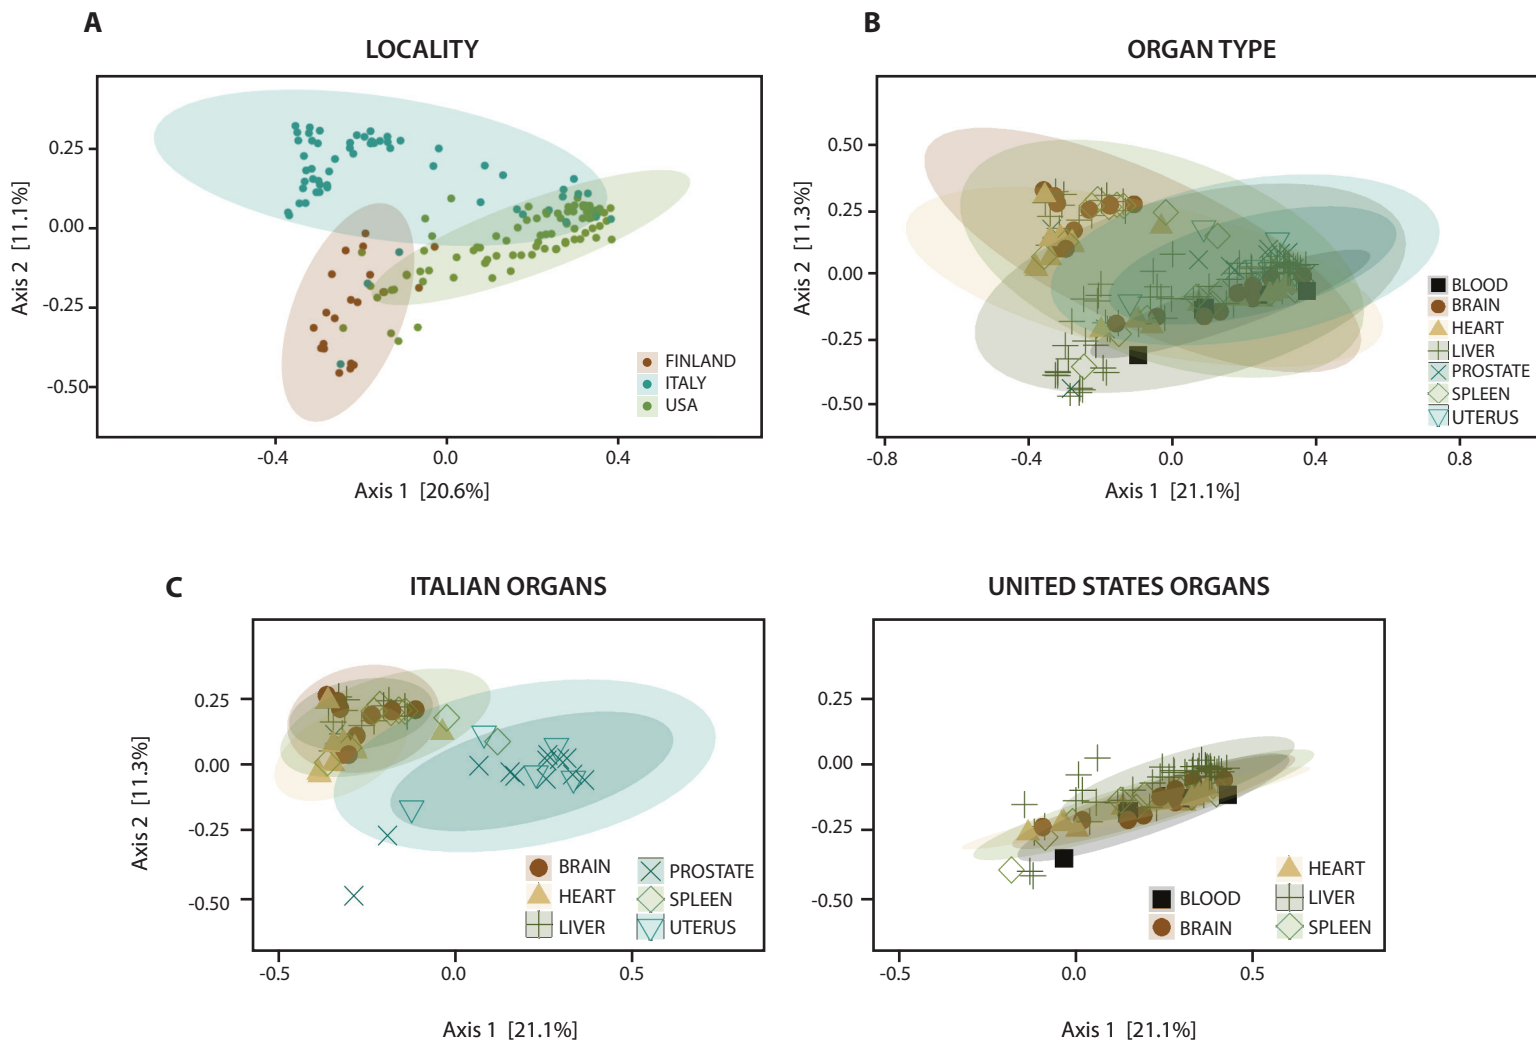

Figure 4

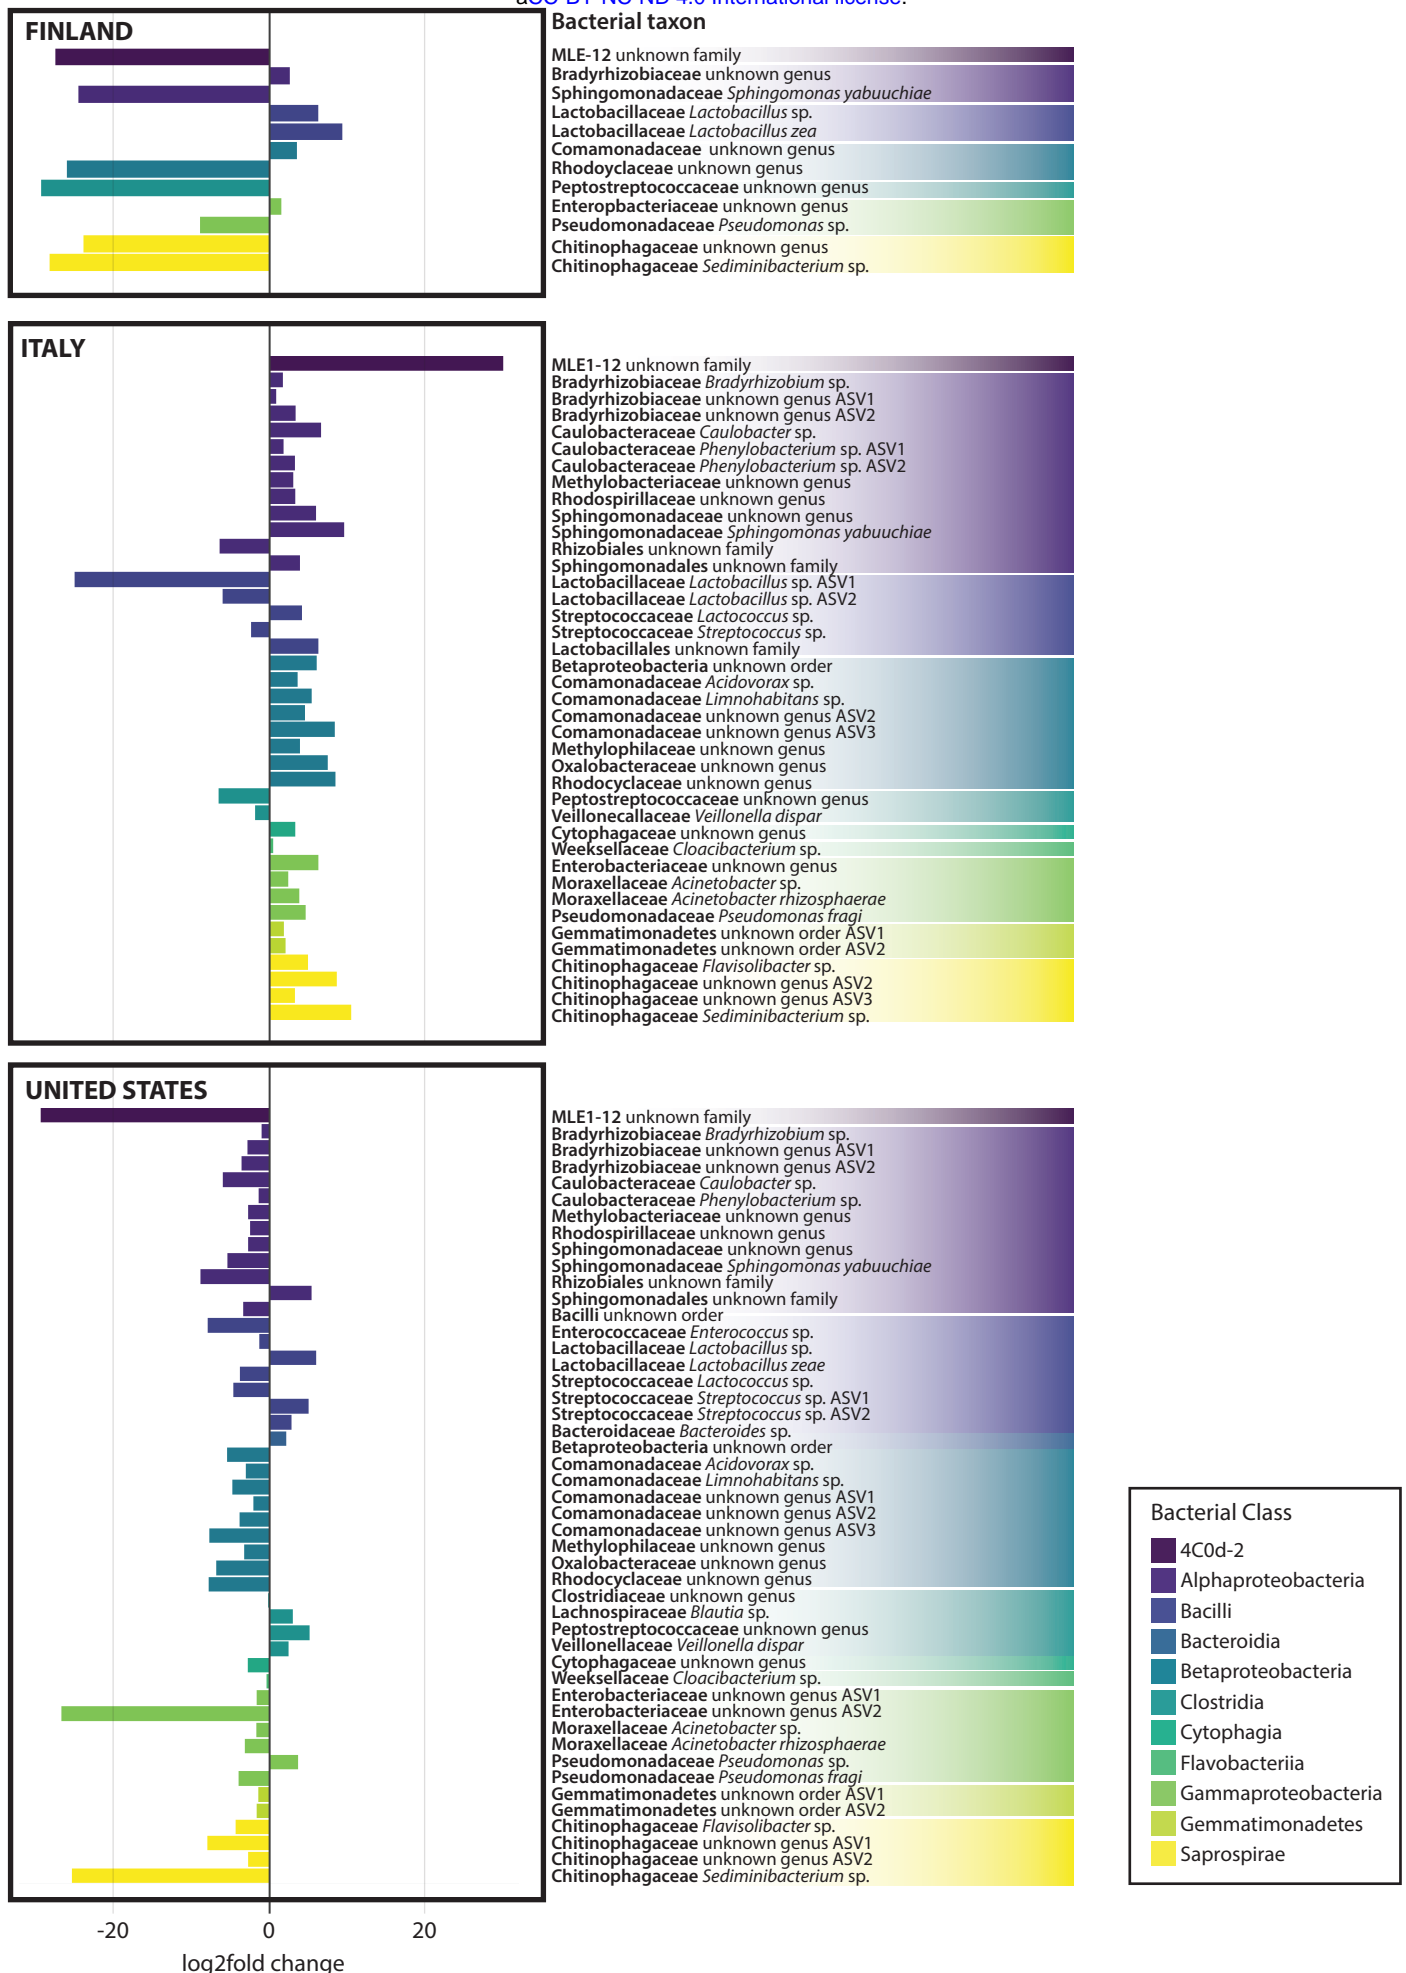



**Figure 5**

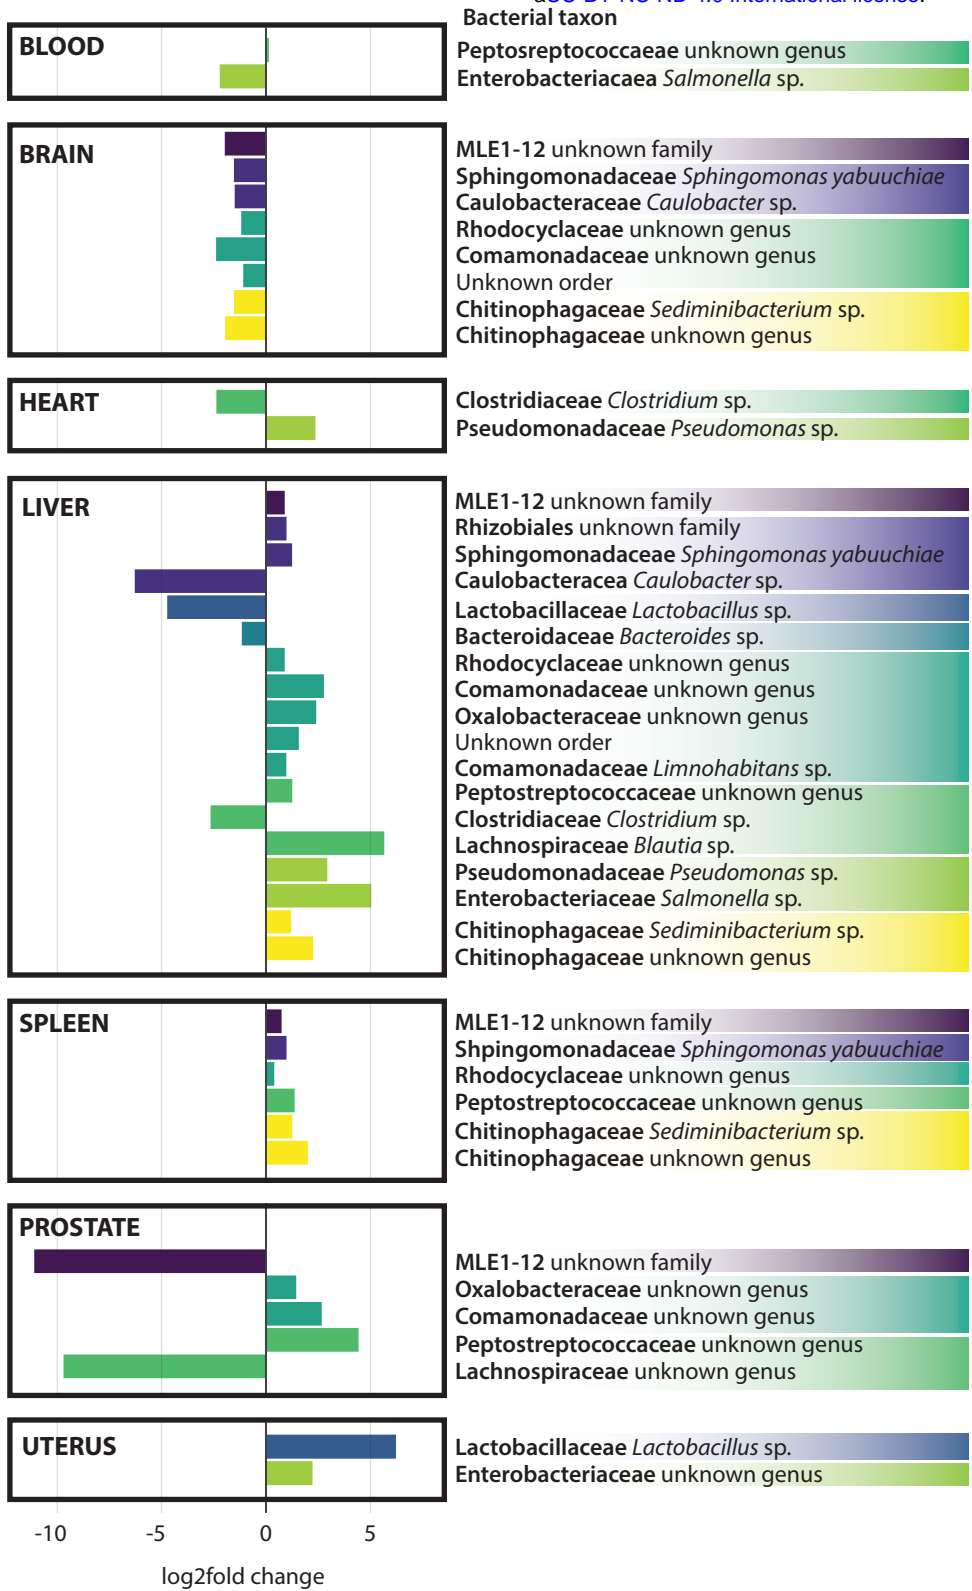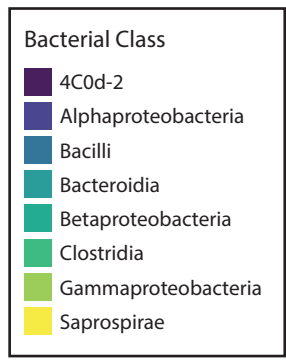

Figure 6

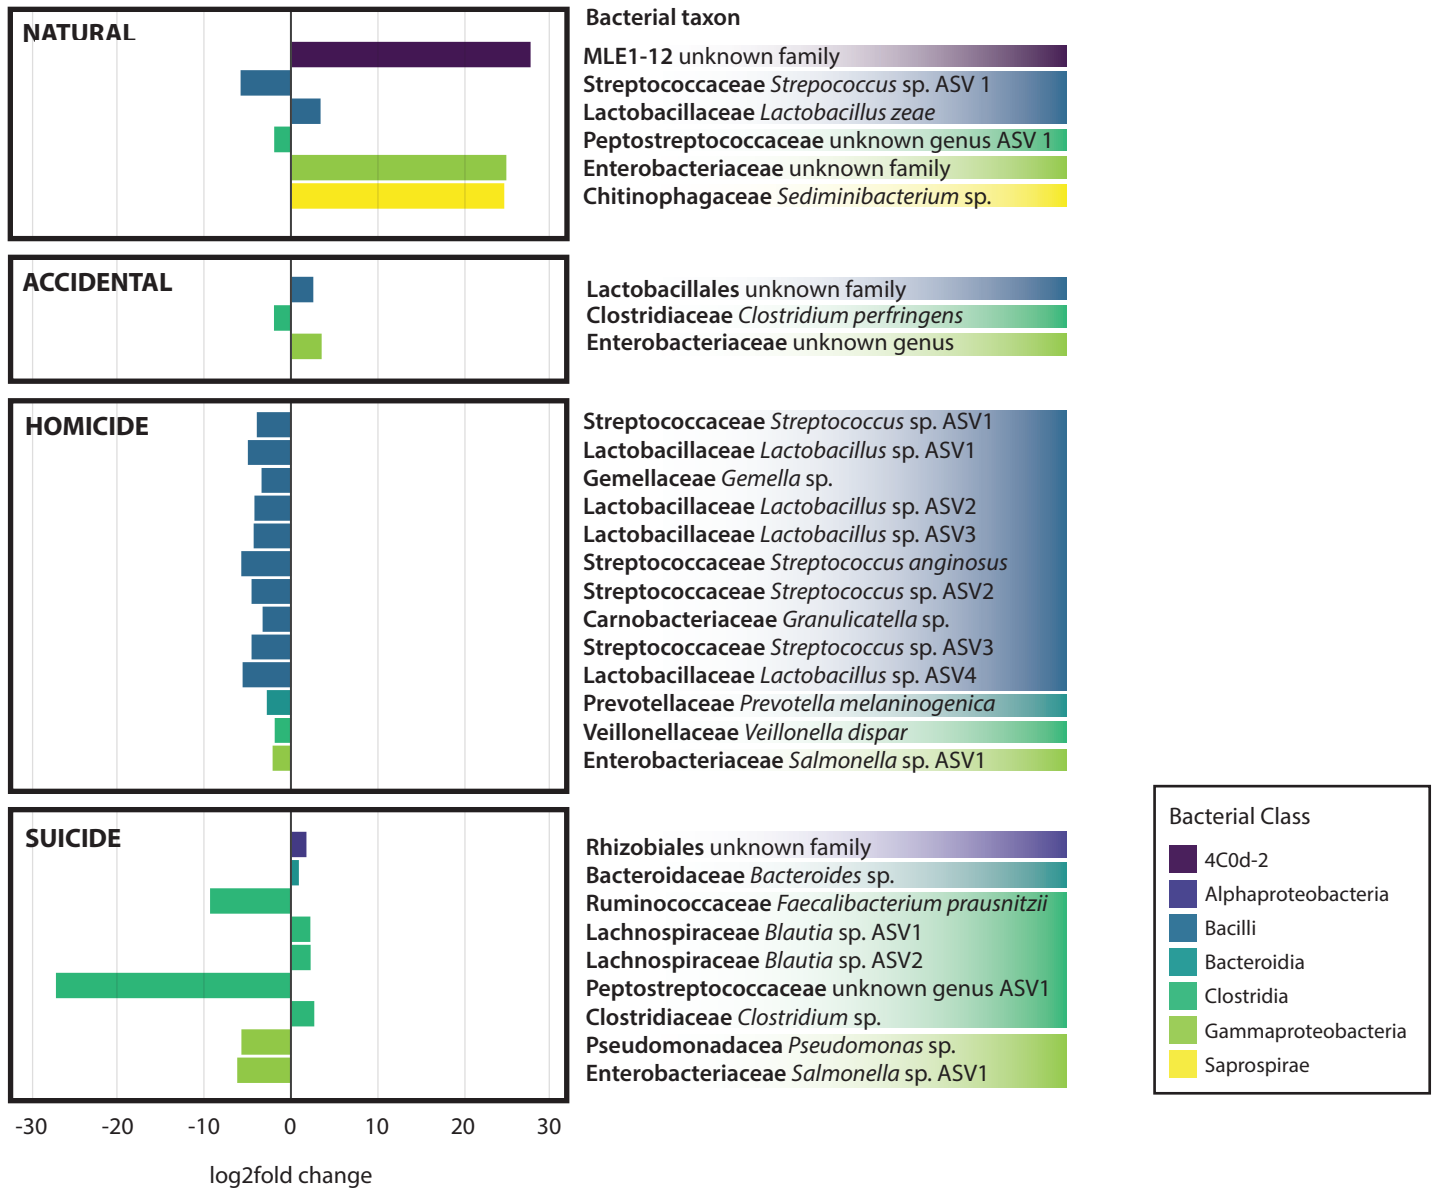

Source: https://www.biorxiv.org/content/10.1101/752576v1.full.pdf
